# 1 **Exploring multiple sensory systems in ovipositors of *Drosophila suzukii*** 2 **and related species with different egg-laying behaviour**

3 Cristina Maria Crava<sup>a</sup>, Roberto Romani<sup>b</sup>, Damiano Zanini<sup>c</sup>, Simone Amati<sup>a</sup>, Giorgia Sollai<sup>d</sup>, Roberto  
4 Crnjar<sup>d</sup>, Albrecht Haase<sup>c</sup>, Marco Paoli<sup>c</sup>, Marco Valerio Rossi-Stacconi<sup>a</sup>, Omar Rota-Stabelli<sup>a</sup>,  
5 Gabriella Tait<sup>a</sup>, Gianfranco Anfora<sup>a,e</sup>

6

7 <sup>a</sup>Research and Innovation Centre, Fondazione Edmund Mach, San Michele all'Adige, Italy

8 <sup>b</sup>Department of Agricultural, Food and Environmental Sciences, University of Perugia, Borgo XX  
9 Giugno 74, 06121, Perugia, Italy

10 <sup>c</sup>Center for Mind/Brain Sciences and Department of Physics, University of Trento, Rovereto, Italy

11 <sup>d</sup>Department of Biomedical Sciences, Section of Physiology, University of Cagliari

12 <sup>e</sup>Centre Agriculture, Food and Environment (C3A), University of Trento, San Michele all'Adige, Italy

13

14 CURRENT ADDRESS:

15 Cristina Maria Crava: ERI BIOTECMED, University of Valencia, Burjassot, Spain

16 Damiano Zanini: Neurobiology and Genetics, Biocenter, University of Würzburg, Würzburg,

17 Germany

18

## 19 ABSTRACT

20 *Drosophila suzukii* is an invasive agricultural pest species that lays eggs in fruit during ripening,  
 21 while most closely related *Drosophila* species use rotten matter as oviposition substrates. This  
 22 behaviour is allowed by an enlarged and serrated ovipositor that can pierce intact fruit skin. *D.*  
 23 *suzukii* combines multiple sensory systems (mechanosensation, olfaction, and taste) to select  
 24 oviposition sites. Here, we test the hypothesis that the *D. suzukii* ovipositor is involved in these  
 25 sensory modalities. We first investigate the ovipositor gene expression using a comparative  
 26 framework of four *Drosophila* species with gradual changes in ovipositor morphology to identify  
 27 evolutionary adaptations specific to *D. suzukii*. Results show transcription of chemoreceptors and  
 28 mechanoreceptors in the four species, with a common core of sensory receptors expressed in all  
 29 of them. Then, we demonstrate that sensory structures present in the distal tip of the *D. suzukii*  
 30 ovipositor are mechanosensory-like sensilla, and that the degenerin/epithelial sodium channel *ppk*  
 31 is expressed in homologous structures in *Drosophila melanogaster*. Our results suggest the *D.*  
 32 *suzukii* ovipositor playing a role in mechanosensation, which might be shared with other  
 33 *Drosophila* species.

34

## BACKGROUND

*Drosophila suzukii* (Matsumura) (Diptera Drosophilidae), also called spotted wing drosophila, is an invasive South Eastern Asian fly species that was identified outside its native range in California (US) in 2008 and in Spain and Italy (Europe) in 2009 (1,2). Since then, it has quickly spread across both continents and settled down in several countries, where it represents a major threat for soft fruit production (3). Differently from the majority of drosophilids, which thrive and lay eggs on already damaged or rotting vegetal substrates, *D. suzukii* is able to pierce and lay eggs on healthy ripening fruits before harvesting. Wherever it is present, this causes extensive agricultural damage and has boosted research on the ecology and chemosensory behaviour of this pest with the aim to find innovative, effective, and eco-friendly methods to reduce its attacks (reviewed in 4).

Several aspects of *D. suzukii* ecology and genetics have been analysed in a comparative *Drosophila* framework to identify key evolutionary innovations that allowed the transition from rotten to fresh fruit egg-laying behaviour (5–10). The major morphological shift from rotten fruit-ovipositing *Drosophila* species (like the insect model *Drosophila melanogaster*) is the presence of an unusually enlarged and serrated ovipositor, which is shared with the sister species *Drosophila subpulchrella*, and allows the wounding of the intact skin of berries (Figure 1) (7). This feature is not present in another closely related Asiatic spotted wing *Drosophila* species, *Drosophila biarmipes*, whose ovipositor shows intermediate features between *D. suzukii* and *D. melanogaster* (Figure 1).

The ovipositor morphology correlates with the stiffness of the oviposition substrates, and serrated designs facilitate egg laying by attenuating the required penetration forces to cut through the fruit skin. In fact, *D. melanogaster* egg-laying is inhibited by stiff substrates, whereas *D. suzukii* has a broad tolerance, and *D. biarmipes* displays an intermediate behaviour (9). Besides mechanosensation, also the chemical composition of the egg-laying substrate contributes to *D.*

*suzukii* oviposition behaviour: strawberry odours are sufficient to elicit oviposition, suggesting that olfaction has an important role in egg-laying site choice decision. Moreover, olfaction-impaired *D. suzukii* performed as wild-type flies (they prefer ripe over rotten strawberries puree) when allowed to get in touch with the oviposition substrate (9). Hence, contact chemosensory systems, such as taste, are likely used by *D. suzukii* for egg-laying site selection together with olfaction and mechanosensation. Insects detect non-volatiles compounds mainly through the gustatory receptor neurons (GRNs), which are scattered over various locations across their body. In *D. melanogaster*, GRNs house either gustatory receptors (GRs) or ionotropic receptors (IRs), and in adults they are mainly located at the labellum and along the legs (11). It has long been suggested that GRNs are also present in the ovipositor of *D. melanogaster* (12,13) as it was demonstrated in other insect species (14–17). However, a functional characterization of these structures is lacking. An intact hydrophobic cuticle, that prevents water loss and microbial contamination, covers healthy undamaged fruits (18). We therefore conjecture that, differently from other drosophilids, which can easily taste rotten fruit substrates with legs and mouthparts, fruit cuticle of ripening fruits likely prevents *D. suzukii* probing with these appendages. The ovipositor pierces fruit skin and comes into contact with fruit flesh, thus the possibility that this organ may carry chemosensory organs which contribute to egg-laying decision is suggestive.

Here, we test this hypothesis using RNAseq to map the transcriptional profile of the female abdominal distal tip into a phylogenetical framework composed by *D. suzukii* and other three *Drosophila* species characterised by gradual changes in their ovipositor structure (from blunt to serrated ovipositor) (Figure 1). One of our aims is to understand if the presence of chemosensory-related transcripts might be a common *Drosophila* feature or something unique to fresh-fruit-ovipositing *Drosophila* species. We found expression of a set of chemosensory and mechanosensory-related mRNA conserved among the four species. This prompted a detailed

analysis of the ultrastructure of pegs and sensilla present at the ovipositor of *D. suzukii*, and the use of transgenic *D. melanogaster* GAL4-drivers to provide evidence of sensory neuron-specific genes expressed in ovipositor pegs.

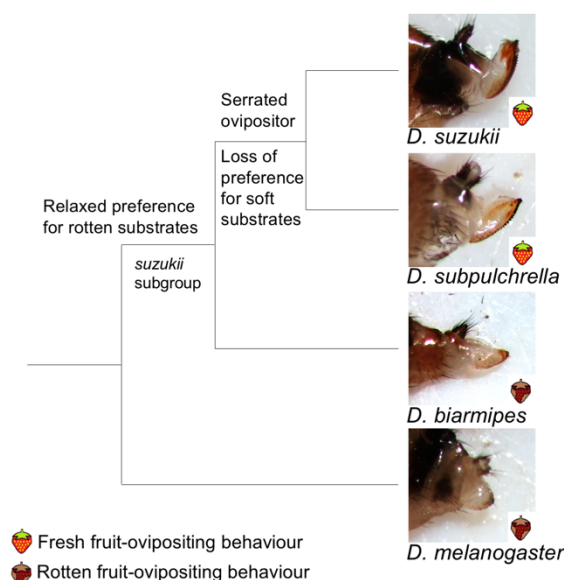

**Figure 1 Evolutionary affinities and ovipositor shapes of *Drosophila suzukii* and other *Drosophila* species used in the study.**

The currently most accepted scenario for fresh fruit-egg laying behaviour evolution (9). Phylogeny is based on (7).

## METHODS

### Insects

Insects used for transcriptomics, immunohistochemistry, and electron microscopy were taken from laboratory colonies maintained at the Fondazione Edmund Mach (Italy). *Drosophila suzukii* and *D. melanogaster* strains were founded with individuals collected in 2010 in the Trento province (Italy) and periodically refreshed with insects caught from the same field sites. *Drosophila biarmipes* (genotype Dbii\wild-type, stock # 14023-0361.09) and *Drosophila subpulchrella* (Dspc\wild-type, stock # 14023-0401.00) strains were obtained from the *Drosophila* Species Stock

Center in 2011. The four *Drosophila* species were reared on a standard diet (https://stockcenter.ucsd.edu/info/food\_cornmeal.php), maintained at 23–25 °C, 65 ± 5% relative humidity and under a 16:8 h light:dark photoperiod.

*Drosophila melanogaster* transgenic strains used for imaging were obtained from the Bloomington Drosophila Stock Center and reared under the same conditions as described above. GAL4 lines are listed in Supplementary Table S1 and the reporter line expressing hexameric green fluorescent protein (6GFP) was #52262. Three to ten days old mated females were used for the analysis.

#### RNA extraction and sequencing

RNA was extracted from the abdominal distal tip of 3-10 days old mated females. Dissected tissues were stored at –80 °C in RNAlater (ThermoFisher Scientific) until extraction. Each species sample was composed of RNA extracted from around 60-80 individuals. Samples were homogenized using TissueLyser (Qiagen) and total RNA was extracted with TRIzol reagent (ThermoFisher Scientific), following the manufacturer's protocol. DNA contamination was removed with a DNase I (ThermoFisher Scientific) incubation step. A second RNA extraction with PureLink RNA Mini Kit (ThermoFisher Scientific) was performed to remove DNase and concentrate samples. Total RNA (~1 µg/sample) was sent to Beckman Coulter Genomics (Danvers, MA USA) for library preparation and Illumina sequencing. Library preparation was carried out through polyA + selection and paired-end (PE) sequencing was run on an Illumina HiSeq 2500 System with V3 chemistry that generated 100 bp reads. Raw reads are accessible from the Genbank SRA database (BioProject number PRJNA526247) (Supplementary Table S2).

## 121 *De novo transcriptome assembly, annotation, and gene ontology*

122 Raw reads were trimmed with Trimmomatic (19). Both paired and unpaired reads were used for a  
 123 *de novo* assembly of the transcriptome for each species with Trinity v2.0.6 (20), using the  
 124 normalization step and flag --min\_kmer\_cov 2. The transcriptome quality was checked by mapping  
 125 the paired reads against the assembled transcriptome with Bowtie (21) (Supplementary Table S2).  
 126 The four transcriptomes were annotated using Standalone Blast+ (22). Blast searches were run  
 127 with the command blastx using the predicted proteins from the *D. melanogaster* genome (version  
 128 r6.25) as the database. The top hit for each sequence was retained when the E-value was less than  
 129  $1 \times 10^{-10}$ . PANTHER version 14.0 (23) was used to extract gene ontology (GO) terms (Panther GO-  
 130 Slim) for each annotated transcriptome. Venn diagrams were created using Venny 2.1.0 (24).

## 131 *Quantification of gene expression of species-specific chemosensory-related transcripts*

132 To confirm the identity of chemosensory-related genes in each species and to estimate their  
 133 expression level in each *Drosophila* species, we mapped trimmed PE reads against the dataset of  
 134 manually curated annotations for *D. biarmipes*, *D. sukukii*, and *D. melanogaster* *Or*, *Gr*, *Ir*, and *Obp*  
 135 genes (5,6). For *D. subpulchrella*, we estimated expression only for *Or* and *Gr* genes using an in-  
 136 house curated dataset. Proper PE trimmed reads were mapped to the annotated isoforms using  
 137 Bowtie v1.0.0 (21), and the read counts were estimated by RSEM v1.2.20 (25). Genes were defined  
 138 as expressed if they had at least twenty RSEM estimated expected counts. Transcripts per million  
 139 reads (TPM) were visualized with heatmap.2 implemented in package gplots (R Core Team, 2015)  
 140 to compare expression levels among species.

## 141 *Reverse transcription PCR of D. sukukii chemosensory-related genes*

142 Expression of chemosensory receptor genes, found to be expressed in the *D. sukukii* abdominal  
 143 distal tip by RNAseq analysis, was confirmed by reverse transcription PCR (RT-PCR). *Orco* and *Gr64*,  
 144 which were not found to be expressed by RNAseq, were used as negative control and genomic

145 DNA as positive control. The used primers are listed in Supplementary Table S3. RNA was  
 146 extracted with Trizol and treated with DNase I as described before. 1 µg RNA was then  
 147 retrotranscribed to cDNA with SuperScript III Reverse Transcriptase (ThermoFisher Scientific)  
 148 following the manufacturer's protocol. To control for genomic DNA contamination, RNA  
 149 underwent a parallel mock reverse transcription step in which the reverse transcriptase was  
 150 omitted. Amplifications were carried out with GoTaq Green Master Mix (Promega) in a final  
 151 volume of 25 µl containing 1 µl of cDNA diluted 1:10 and 0.4 µM of each primer, at the following  
 152 conditions: 2 min at 95°C, then 25 cycles composed by a 30 s step at 95°C, 30 s at 55°C, and 1 min  
 153 at 72°C, followed by a final elongation step of 5 min at 72°C. PCR amplicons were run on 1%  
 154 agarose gel stained with Midori Green Advance (Nippon Genetics).

#### 155 *Drosophila suzukii* ovipositor immunohistochemistry

156 *Drosophila suzukii* adult females were anesthetized using CO<sub>2</sub>. Abdominal distal tips were cut with  
 157 a razor blade and fixed in 4% PFA in PBS (Sigma-Aldrich) for 40 min on ice. Samples were then  
 158 washed three times with PBS for 20 min, incubated in 10% sucrose (Sigma-Aldrich) solution, and  
 159 kept rotating for 1 h at room temperature (RT). Sucrose was changed to 25% solution, and  
 160 samples were kept rotating overnight at 4°C. Samples were then embedded in OCT (OCT mounting  
 161 medium Q PATH, VWR) and mounted on a sample holder. Sections of 15 µm thickness were cut  
 162 with a CM 1510-3 cryostat (Leica) and collected on a SuperFrost glass slide (ThermoFisher  
 163 Scientific).

164 Slides were washed in PBS-T (PBS + 0.1% Triton-X-100, Sigma-Aldrich) for 5 min and then  
 165 blocked in 5% normal goat serum (Sigma-Aldrich) in PBS-T for 30 min. Anti-horseradish peroxidase  
 166 (HRP) cyanine-conjugated antibody (Cy3 AffiniPure Rabbit Anti-Horseradish Peroxidase, Jackson  
 167 ImmunoResearch) diluted 1:300 was used to stain the neurons. Slides were kept in a moist chamber  
 168 at 4°C overnight in dark. The next day, antibodies were removed, and the slides were washed three



169 times with PBS-T for 5 min, mounted using Vectashield (Vector Laboratories), and imaged on a  
170 confocal microscope TCS SP8 (Leica).

# 171 *Drosophila suzukii* ovipositor scanning electron microscopy

172 Adult females of *D. suzukii* were anaesthetized by exposure to cold temperatures (-18°C) until  
173 death, then they were immediately soaked in 60% alcohol. The ovipositor of each individual was  
174 dissected from the abdomen. Specimens were dehydrated in a series of graded ethanol, from 60%  
175 to 99%, 15 min for each step. After dehydration, 99% ethanol was substituted with pure HMDS  
176 (Hexamethyldisilazane, Sigma-Aldrich) and the specimens were allowed to dry under a hood at  
177 room temperature; this step was repeated twice. Up to five samples were mounted on aluminium  
178 stubs, with different orientations, in order to obtain a clear view on the ventral and lateral sides of  
179 the ovipositor. Mounted specimens were gold-sputtered using a Balzers Union SCD 040 unit  
180 (Balzers). The observations were carried out using a Philips XL 30 scanning electron microscope  
181 (SEM) operating at 7-10 KV, WD 9-10 mm.

# 182 *Drosophila suzukii* ovipositor transmission electron microscopy

183 Ten female *D. suzukii* individuals were anesthetized by exposure to cold temperatures (-18°C) for  
184 60 s, then immediately immersed in a solution of glutaraldehyde and PFA 2.5% in 0.1 M cacodylate  
185 buffer plus 5% sucrose, pH 7.2-7.3. The ovipositor was detached from the abdomen, reduced in  
186 size to help fixative penetration, and left at 4°C for 24 h. Then, the specimens were washed twice  
187 in cacodylate buffer for 10 min, post-fixed in 1% OsO<sub>4</sub> for 1 h at 4°C, and rinsed in the cacodylate  
188 buffer. Dehydration in a graded ethanol series from 60% to 99%, was followed by embedding in  
189 Epon-Araldite with propylene oxide as bridging solvent. Thin sections were taken with a diamond  
190 knife on an LKB Bromma ultramicrotome (LKB) and mounted on formvar-coated 50 mesh grids.  
191 Then, sections on grids were stained with uranyl acetate (20 min, RT) and with lead citrate (5 min,

RT). Finally, the sections were imaged with a Philips EM 208 transmission electron microscopy (TEM). A digital camera MegaViewIII (SIS) provided high-resolution images.

# *Examination of GAL4-driven GFP expression patterns in D. melanogaster ovipositor*

The native GFP signal was observed at the level of the ovipositor of females expressing the super bright 6GFP reporter under the pattern of several GAL4-drivers. Flies were anesthetized using CO<sub>2</sub>, abdominal distal tips were cut, embedded in 70% Glycerol, and imaged with the confocal microscope TCS SP8 (Leica).

## RESULTS

### *Sequencing data and annotation of sensory genes*

Illumina RNA-seq libraries from the abdominal distal tip of four *Drosophila* species generated an average of 60M ( $\pm 2.4$ M SD) 100 bp paired-end reads. This resulted in four *de novo* assembled transcriptomes with contig counts ranging from 31'315 (*D. subpulchrella*) to 40'162 (*D. suzukii*) (Supplementary Table S2). On average, 70% of contigs from each of the four transcriptomes had a blastx hit against *D. melanogaster* predicted proteome (Supplementary Dataset S1). In particular, *D. suzukii* hit 11'840 unique *D. melanogaster* predicted proteins, whereas *D. subpulchrella*, *D. biarmipes*, and *D. melanogaster* had 10'973, 11'687, and 12'734 unique *D. melanogaster* hits, respectively. Panther functional classification revealed that the Gene Ontology (GO) composition of assembled contigs was similar among the four species (Figure 2A and Supplementary Figure S1). The most represented Molecular Function GO-slim terms were binding and catalytic activity, whereas the metabolic process, biological regulation, and cellular component organization were the most represented Biological Process GO-slim terms (Figure 2A). Of 10'774 *D. melanogaster* genes encoding for proteins that hit assembled contigs, 7294 were common among the four *Drosophila* species, thus representing the conserved transcriptional core for the distal abdominal

tip (which was enriched for the ovipositor, but also included the internal genitalia, the anal plate, and some abdominal tissues). On the contrary, 131, 163, 187, and 682 genes hit specifically *D. subpulchrella*, *D. suzukii*, *D. biarmipes*, or *D. melanogaster* contigs, respectively (Figure 2B).

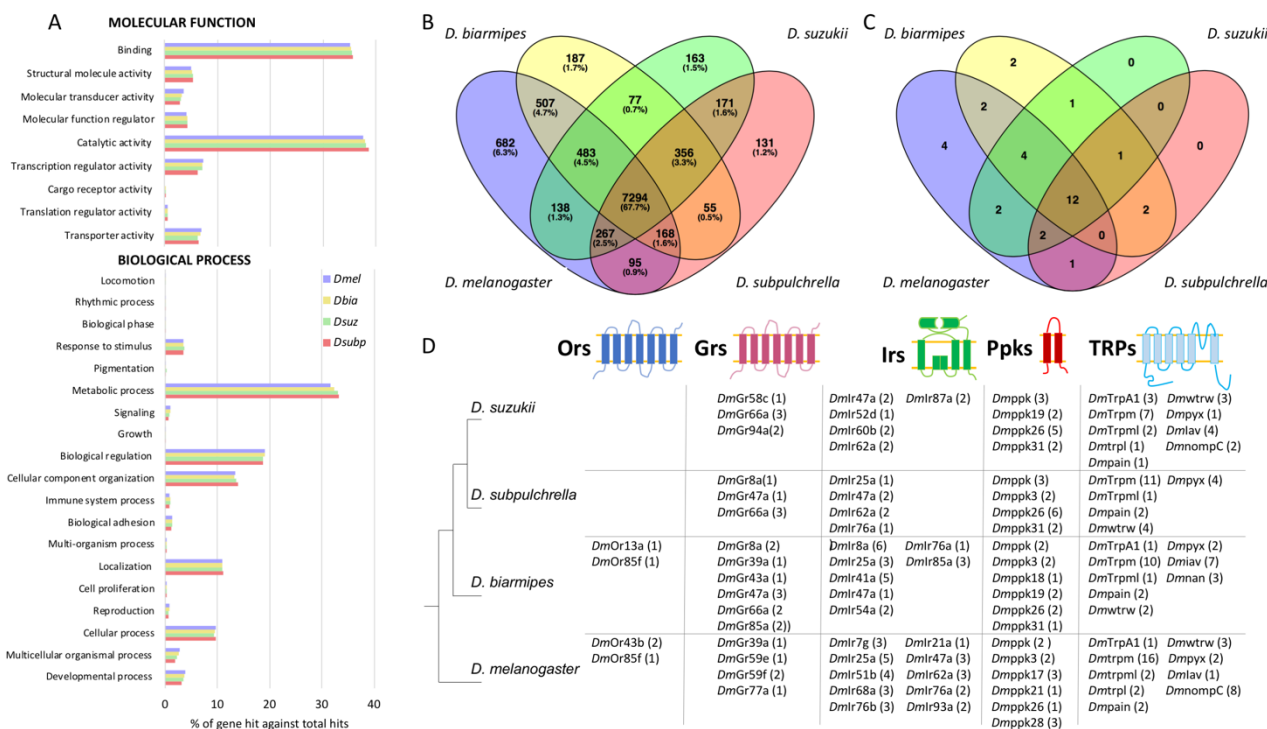

**Figure 2. Annotation of transcriptomes from the abdominal distal tip of four *Drosophila* species reveals a core of conserved transcripts involved in sensory perception.** (A) Gene Ontology (GO) classification for the four transcriptomes referred to Molecular Function and Biological Process (Panther GO-Slim terms). Abbreviations: Dmel, *D. melanogaster*; Dbia, *D. biarmipes*, Dsuz, *D. suzukii*, Dsubp, *D. subpulchrella*. (B) Venn diagram representing the unique *D. melanogaster* gene hits retrieved by blastx searches using contigs from each transcriptome as query. (C) Venn diagram representing the unique *D. melanogaster* odorant binding protein (Obp) gene hits retrieved by blastx searches for each transcriptome. (D) Schematic representation of the number of unique *D. melanogaster* gene hits encoding for sensory receptors (ORs: odorant receptors; GRs: gustatory receptors; IRs: ionotropic receptors; Ppks: pickpocket proteins; TRPs: transient receptor potential channels) retrieved in each *Drosophila* transcriptome by blastx searches. Between parentheses the number of contigs matching the same *D. melanogaster* gene hit.

Among contigs annotated by blastx searches, we various transcripts encoding for sensory receptors belonging to different classes: chemoreceptors such as odorant receptors (ORs), gustatory receptors (GRs), and ionotropic receptors (IRs), as well as other sensory receptors such

as pickpocket proteins (ppks) from the degenerin/epithelial sodium channels (DEG/ENaC) gene superfamily (which contribute to mechanosensation) and transient receptor potential channels (TRPs) (which virtually contribute to every sensory modality from chemosensation to mechanosensation and thermotransduction) (Figure 2D). Of classical chemosensory receptors, 4 gustatory receptors (GRs), 4 ionotropic receptors (IRs), and 1 odorant receptor (OR) were expressed in more than one species. We also found a consistent number of contigs annotated as odorant binding proteins (OBPs) in the four transcriptomes (from 18 putative unique OBPs in *D. subpulchrella* to 27 in *D. melanogaster*). Likewise chemosensory receptors, the identity of these contigs was largely shared between the four species (Figure 2C). Of 13 *trp* genes present in *D. melanogaster* genome (26), 5 were found putatively expressed in *D. subpulchrella*, 8 in *D. biarmipes*, and 9 in *D. melanogaster* and *D. suzukii*. Of these, 5 were conserved among the four species (Figure 2D). Unique pickpocket proteins that hit assembled contigs varied from 4 (*D. suzukii* and *D. subpulchrella*) to 6 (*D. melanogaster* and *D. biarmipes*), and 3 of them were shared among all four species (Figure 2D).

#### Species-specific RNAseq expression patterns of chemosensory-related transcripts

We profiled the expression levels of chemosensory-related genes in the four *Drosophila* abdominal tips by mapping their reads against available manually-annotated chemosensory gene datasets for the four species (5,6). This led us to finely define which isoform was expressed in each species. Only genes that had  $\geq 20$  RSEM expected counts were considered expressed and designated as the set of abdominal distal tip genes (Supplementary Dataset S2).

We found expression of 14 chemosensory receptors in both *D. melanogaster* (3 *Grs*, 1 *Or*, and 10 *Irs*) and *D. biarmipes* (4 *Grs*, 2 *Ors*, and 8 *Irs*), and 8 in *D. suzukii* (2 *Grs*, 1 *Or*, and 5 *Irs*) (Figure 3 and Supplementary Figure S2). In *D. subpulchrella*, we tested only for *Gr* and *Or* transcription, and 2 *Grs* and 1 *Or* met our formal criteria for abdominal tip expression (Figure 3).

Our analysis identified *Gr66a* and *Or43b* as expressed in the four *Drosophila* species, as well as 2 *Ir* genes were found in the three species tested for this gene family: *Ir47a* and *Ir62a*. These 4 genes likely represent a conserved core of chemoreceptors expressed in the abdominal distal tip of *Drosophila* species. We could not detect no expression of the co-receptor *Orco* in any *Drosophila* species and its absence was also confirmed in *D. suzukii* by RT-PCR (Supplementary Figure S2). Expression patterns of other chemosensory receptor genes were variable, and most of them showed a species-specific expression. Only *Gr94a* was expressed in both *D. suzukii* and *D. subpulchrella*, *Ir75d* in *D. suzukii* and *D. melanogaster*, and *Ir25a* in *D. melanogaster* and *D. biarmipes*.

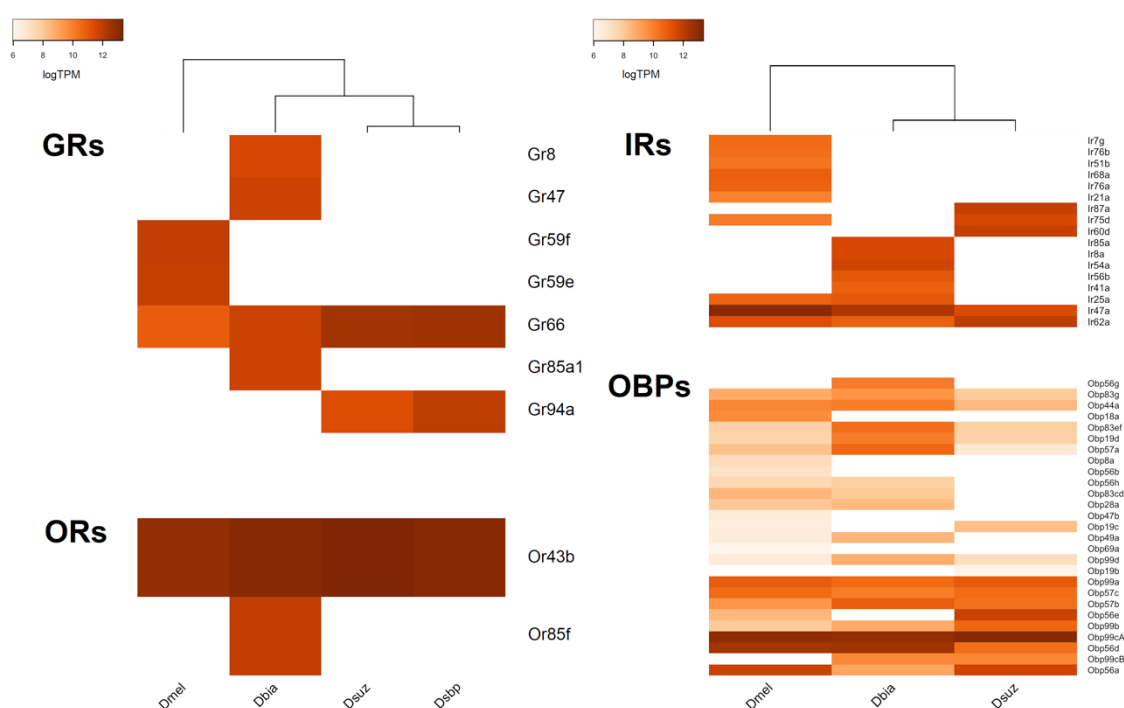

**Figure 3. RNAseq expression levels of chemosensory-related genes in the abdominal distal tip of four *Drosophila* species.** Heatmaps depict the expression level (calculated as transcripts per million, TPM) for each chemosensory-related gene found to be expressed in the most abdominal tip of *D. melanogaster* (Dmel), *D. biarmipes* (Dbia), *D. suzukii* (Dsuz), and *D. subpulchrella* (Dsbp). Expression levels were calculated using the manually curated datasets from (5,6). For *D. subpulchrella*, we used an in-house dataset containing only GRs and ORs

275 sequences. Abbreviations: gustatory receptors (GRs), ionotropic receptors (IRs), odorant receptors, (ORs),  
276 and odorant binding proteins (OBPs).

277

278 The dynamic range of chemosensory receptor expression in *Drosophila's* abdominal distal  
279 tip was similar among species. Within each species, the most expressed or the second most  
280 expressed gene was *Or43b*. More generally, in each species mean expression levels of genes that  
281 shared transcription across species were substantially higher than the mean levels of the species-  
282 specific expressed genes (from 2 to 4-fold higher) (Supplementary Dataset S2).

283 RNAseq revealed the expression from 17 to 24 *Obp* genes in the three *Drosophila* species  
284 tested. The expression patterns of the three species largely overlapped since 13 *Obps* were  
285 expressed in *D. melanogaster*, *D. biarmipes*, and *D. suzukii*. On the other way around, species-  
286 specific expressed *Obps* were few: 5 in *D. melanogaster* and only 1 in both *D. biarmipes* and *D.*  
287 *suzukii*. Their expression levels were substantially lower than those of chemosensory receptor  
288 genes. Within each species, the mean level expression of *Obps* was from 3 to 4-fold lower than the  
289 mean level of chemoreceptors. Only *Obp99cA* had expression levels that were comparable to  
290 *Or43b* (Figure 3).

#### 291 *Ultrastructure of sensilla and pegs located on D. suzukii ovipositor*

292 Transcriptional profiles supported the hypothesis of chemosensory and mechanosensory  
293 perception in the abdominal distal tip of the four *Drosophila* species. To investigate the  
294 contribution of these sensory modalities in *D. suzukii* egg-laying behaviour, we analysed at the  
295 ultrastructural level the small bristles and pegs located at the tip of the ovipositor. Our  
296 observations revealed the presence of four different types of structures: conical pegs type 1 ,  
297 conical pegs type 2, trichoid sensilla and chaotic sensilla (Figure 4).



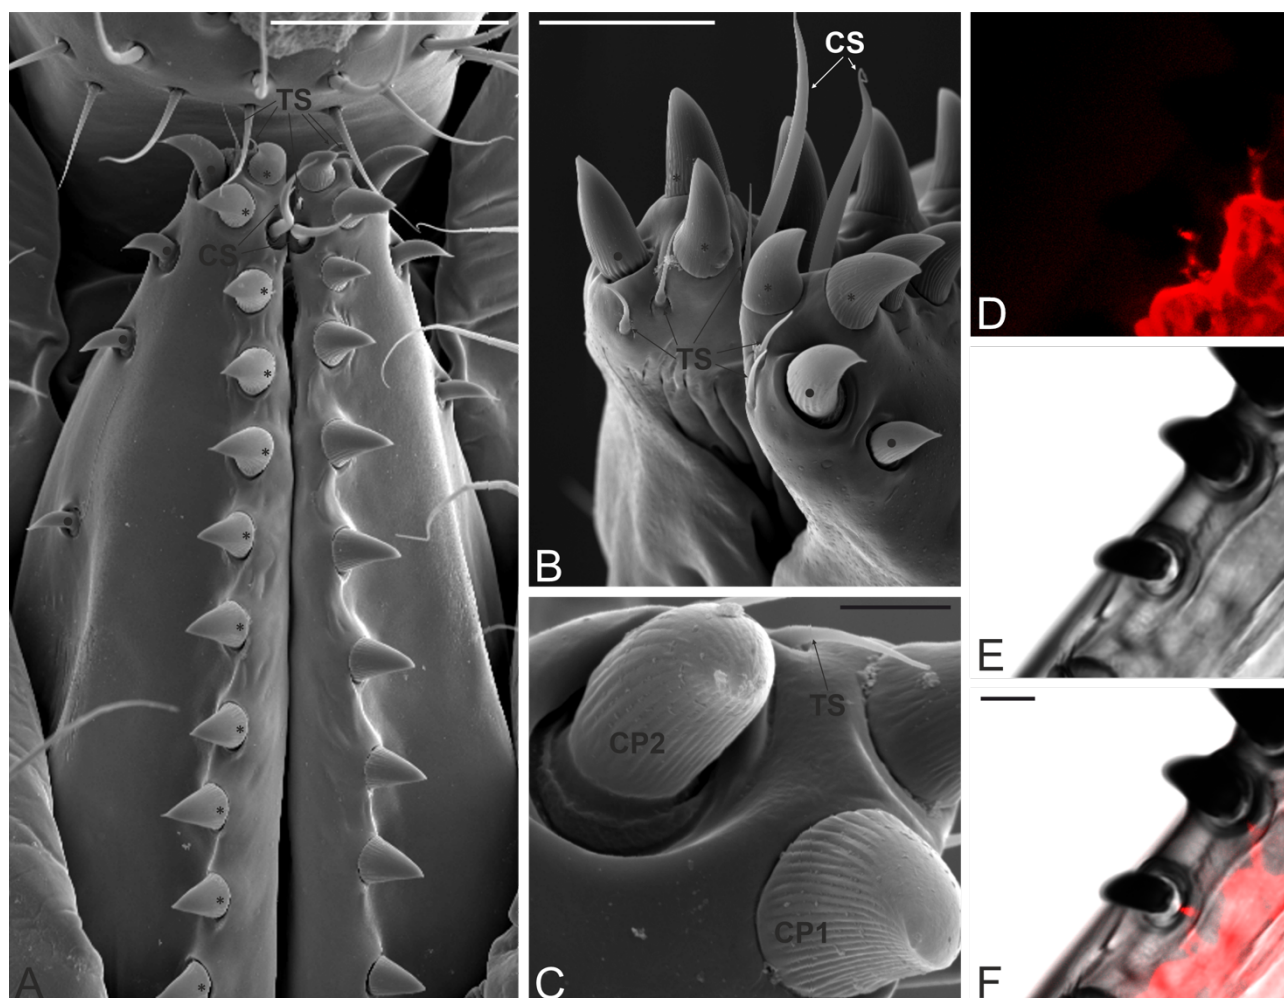

**Figure 4. *Drosophila suzukii* ovipositor pegs and sensilla are innervated sensory structures**

**(A)** Ventral view of the ovipositor of *D. suzukii* showing the two ovipositor plates and the different structures that are present. The tip of each plate presents three trichoid sensilla (TS) and a chaetic sensillum (CS). A single row of conical pegs type 1 (\*) is found, with the structures arranged along the ventral edge of each ovipositor plate. Four conical pegs type 2 (●) are present, with the first one sitting at the very tip of the ovipositor plate, while the others are positioned along a medial line of the ovipositor plate. **(B)** Detailed view on the tip of the ovipositor plates. The two apical TS are clearly visible, as well as the third, inserted just behind the most apical CP1. The CS are located very close to the TS. **(C)** Close-up view of the ovipositor plate tip. The CP1 is sitting on a narrow socket; it presents a grooved cuticle that smoothens at the tip. The CP2 is sitting on a large socket; it shows a grooved cuticle as well, but with less evident grooves and a pointed tip. **(D-E)** Immunostaining of cryosection of the ovipositor plate: **(D)** neuronal anti-horseradish peroxidase signal, **(E)** bright-field, **(F)** Merged picture. Scale bars: A: 50  $\mu$ m, B: 20  $\mu$ m, C: 5  $\mu$ m, D-F: 10  $\mu$ m.

CONICAL PEG TYPE1 (CP1): The outer margin of each ovipositor plate presents a single row of stout, conical pegs sitting on narrow sockets in the cuticle (Figure 4A). They are present in a

314 number of about 15 per each plate, with a base diameter of about 10  $\mu\text{m}$  and 15  $\mu\text{m}$  long. CP1 are  
 315 characterised by a cuticular shaft slightly bent towards the external side of the plate. The cuticle is  
 316 grooved externally all along. Each structure ends in a sharp tip, although in some specimens the  
 317 tip appears worn, having a blunt shape (Figure 4C and 5A). The analysis of ultrathin sections shows  
 318 the internal structure of CP1, characterised by a solid, poreless cuticular shaft (Figure 5B-E).  
 319 Micrographs taken at the level of the medial peg region show a thick and continuous cuticular wall  
 320 with a small lumen without sensory neurons (Figure 5C). Imaging at the socket level shows as  
 321 remarkable feature the presence of a single sensory neuron, typically embedded in an electron-  
 322 dense dendrite sheath and ending in a tubular body (Figure 5D-E). The tubular body is located at  
 323 the base of the peg, where a large socket with suspension fibres is evident (Figure 5B-D).

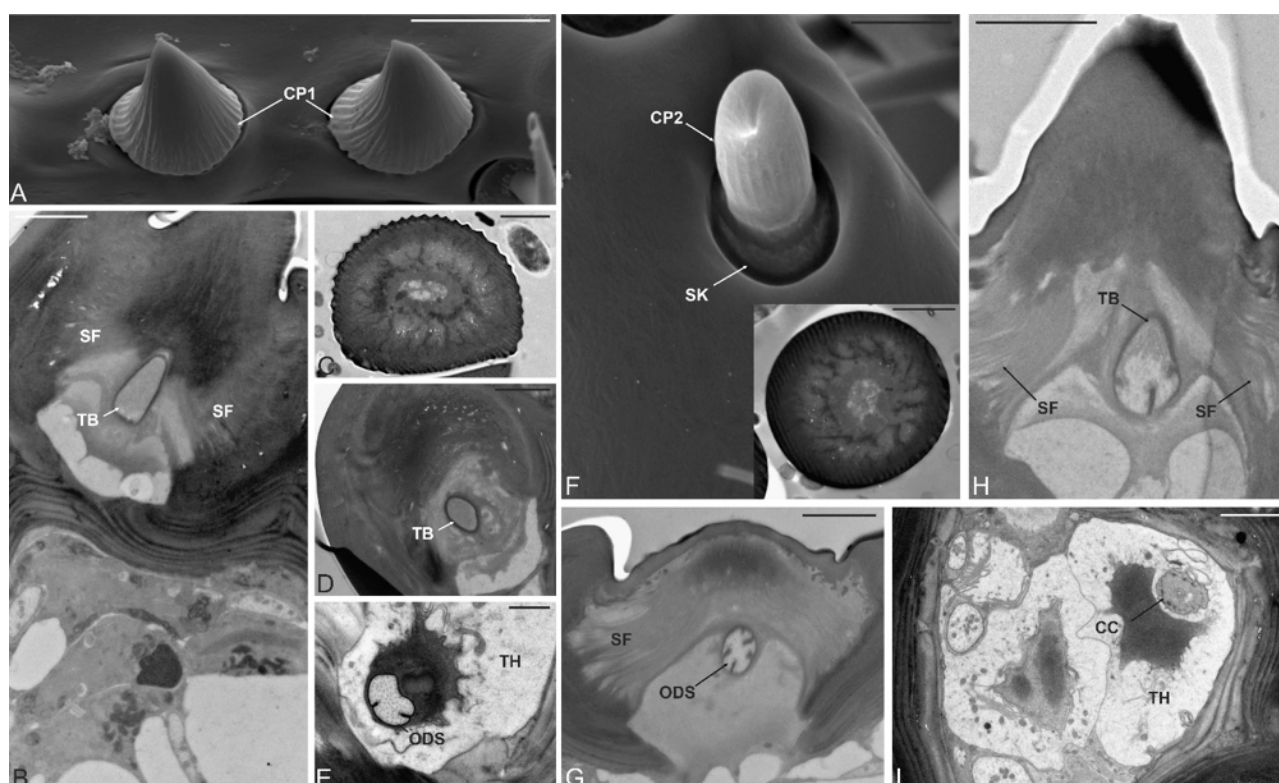

325 **Figure 5. Micrographs showing details of the conical pegs type 1 and type 2 of the *Drosophila suzukii***  
 326 **ovipositor.**

327 **(A)** Scanning electron microscopy (SEM) ventral view of parts of the ovipositor plate ridge, showing two  
 328 conical pegs type 1 (CP1). **(B)** Transmission electron microscopy (TEM) longitudinal section at the socket  
 329 level. The peg is sitting on a narrow socket made of thick cuticle. Suspension fibres (SF) are apparent,



330 holding the peg and giving flexibility to the structure. The single sensory neuron associated with the CP1  
 331 terminates in a tubular body (TB) ending just at the base of the peg. **(C-E)** Serial TEM micrographs of a CP1  
 332 cross sections, taken at different levels, show the solid cuticular structure of the peg **(C)**, the presence of  
 333 the tubular body (TB) at the socket level **(D)**, and the outer dendritic segment (ODS) of the sensory neuron  
 334 enclosed by the thecogen cell (TH) **(E)**. **(F)** SEM ventral view of the ovipositor plate, showing one of the  
 335 conical pegs type 2 (CP2), with a slightly grooved cuticle and a sharp tip. Noticeable is also the large socket  
 336 (SK) on which the CP2 is sitting in the cuticular wall of the ovipositor plate. The inset in **(F)** shows the TEM  
 337 micrograph of a CP2 cross section, taken at half of the length of the peg: the peg is made of solid, thick  
 338 cuticle and presents a reduced lumen, devoid of sensory neurons. **(G-I)** Serial TEM micrographs of a CP2,  
 339 longitudinally and cross sections taken at different levels. They show: in **(G)** the base of a CP2 with a large  
 340 flexible socket and several suspension fibres (SF). The single sensory neuron ends in a tubular body (TB) at  
 341 the base of the peg. In **(H)** the large socket is visible, as well as the outer dendritic segment (ODS) of the  
 342 sensory neuron. In **(I)** a cross section is imaged at a lower level respect to the previous: the sensory neuron  
 343 appears at the ciliary constriction level (CC), and it is enclosed by the thecogen cell (TH). Scale bars: A: 10  
 344  $\mu\text{m}$ , B-D: 2  $\mu\text{m}$ , E: 1  $\mu\text{m}$ , F: 5  $\mu\text{m}$ , inset in F: 2  $\mu\text{m}$ , G-I: 2  $\mu\text{m}$ .

346 CONICAL PEG TYPE2 (CP2): Starting from the tip of each plate, a series of 4 curved sensilla  
 347 are found. They are arranged in line and show decreasing sizes from the most apical one (the  
 348 larger, 14.5  $\mu\text{m}$  long and 6  $\mu\text{m}$  of base diameter) to the proximal one (12.5  $\mu\text{m}$  long and 3.5  $\mu\text{m}$  of  
 349 base diameter) (Figure 4A). The cuticular shaft is slightly grooved along the longitudinal axis for  
 350 most of its length, although the grooves are not as evident as in CP1 (Figure 4C). Each CP2 ends in  
 351 a fine tip that can be absent in case of mechanical worn. The peg is sitting on an evident socket  
 352 within the cuticular wall of the plate (Figure 5F). TEM investigation revealed also for CP2 an  
 353 internal structure similar to the one described for CP1, *i.e.* the presence of a solid cuticular shaft,  
 354 devoid of pores (see inset in Figure 5F), a small internal lumen without sensory neurons, and a  
 355 single sensory neuron with a distal tubular body attached at the base of the peg (Figure 5G-I). The  
 356 peg itself is attached flexibly to the cuticle through a large socket with an abundance of  
 357 suspension fibres (Figure 5G-H).

TRICHOID SENSILLA (TS): At the very tip region of each ovipositor plate, we observed 3 small TS (Figure 4A). Two of them are located on the lower side of the plate (just below and almost in between the largest CP2 and the apical CP1). The third TS is located apically on the medial region of the plate, posteriorly to the apical CP1 (Figure 4B and Supplementary Figure S3). TS are slender and finely tipped sensilla with a smooth cuticular shaft devoid of cuticular pores (12.5  $\mu\text{m}$  long and 1.5  $\mu\text{m}$  of base diameter). These sensilla are sitting in the cuticular wall on distinct sockets, under an angle that makes them run almost parallel to the plate cuticular wall itself. TEM images revealed that TS are made of solid cuticle, there are no pores on the cuticle and no sensory neurons entering the peg lumen (Supplementary Figure S3). A single sensory neuron was found to be associated with TS sensilla, reaching the sensillum base (Supplementary Figure S3).

CHAETIC SENSILLA (CS): Each ovipositor plate shows the presence of a single CS. This sensillum is positioned apically, located medially on the ovipositor plate right behind the most apical CP1 and very close to TS. CS is long (38  $\mu\text{m}$ ) and slender (2.5  $\mu\text{m}$  of base diameter), with a typical curved shape and a very fine tip (Figure 4B and Supplementary Figure S3). It is sitting on a large socket in the plate wall. Externally, the CS wall is smooth. Serial ultrathin sections revealed that the CS cuticular shaft is made of solid cuticle and shows a central lumen not innervated (Supplementary Figure S3). At the base, the shaft is attached to the cuticle and suspended through an elaborated socket with numerous suspension fibres (Supplementary Figure S3). A single sensory neuron was found in this area, it ends in a tubular body that attaches at the sensillum base (Supplementary Figure S3).

### *Neuronal staining of D. suzukii ovipositor pegs*

Anti-HRP was used as a marker to stain the neuronal membrane of the peripheral nervous system (27). HRP labelling showed the presence of a single neuron innervating each CP1s and CP2s (Figure 4D-E and Supplementary Figure S4). Neurons stopped at the CP base level, as evidenced by TEM

382 imaging (Figure 5B and 5G). Altogether, these results suggest that the structures located on *D.*  
 383 *suzukii* ovipositor tip host mechanosensory and not chemosensory neurons. If this inference is  
 384 correct, then these neurons should not express any of the chemosensory-related genes, whose  
 385 expression was found in the abdominal distal tip by RNAseq analysis, but only mechanosensory-  
 386 related genes. To test this hypothesis, we moved to the model organism *D. melanogaster*, whose  
 387 available transgenic toolbox allowed to drive GFP expression in its ovipositor pegs tip (Figure 1).

### 388 *GAL4-driven GFP expression patterns of sensory genes in D. melanogaster ovipositor pegs*

389 In our systematic GAL4 expression analysis, we examined 5 genes encoding chemosensory  
 390 receptors (*Or43b*, *Gr66a*, *Ir47a*, *Ir62a*, and *Ir75d*) and 4 mechanosensory-related genes (*iav*,  
 391 *nompC*, *pain*, and *ppk*), which were found to be expressed by RNAseq analyses in both *D.*  
 392 *melanogaster* and *D. suzukii* abdominal distal tip. One mechanosensory-related gene (*nan*) which  
 393 was found to be expressed only in *D. melanogaster* and the odorant receptor co-receptor *Orco*,  
 394 whose expression was not found in any transcriptome. We also examined 7 GAL4 drivers  
 395 commonly used as markers for mechanosensory neurons and one pan-neuronal marker (28,29).  
 396 Using these GAL4 lines to drive GFP expression, we examined expression in the pegs and sensilla-  
 397 like structures present on the ovipositor tip of *D. melanogaster*.

398 No GAL4 drivers representing any gene encoding chemosensory receptors or *Orco* showed  
 399 expression in sensory-like structure present in *D. melanogaster* ovipositor. Only GAL4 drivers  
 400 representing the pan-neuronal marker *n-syb* (Figure 6A-C) and the sodium channel *ppk* (Figure 6D-  
 401 E) were expressed in the pegs, thus supporting a role in mechanosensory perception for *D.*  
 402 *melanogaster* ovipositor pegs very similar to *D. suzukii*.

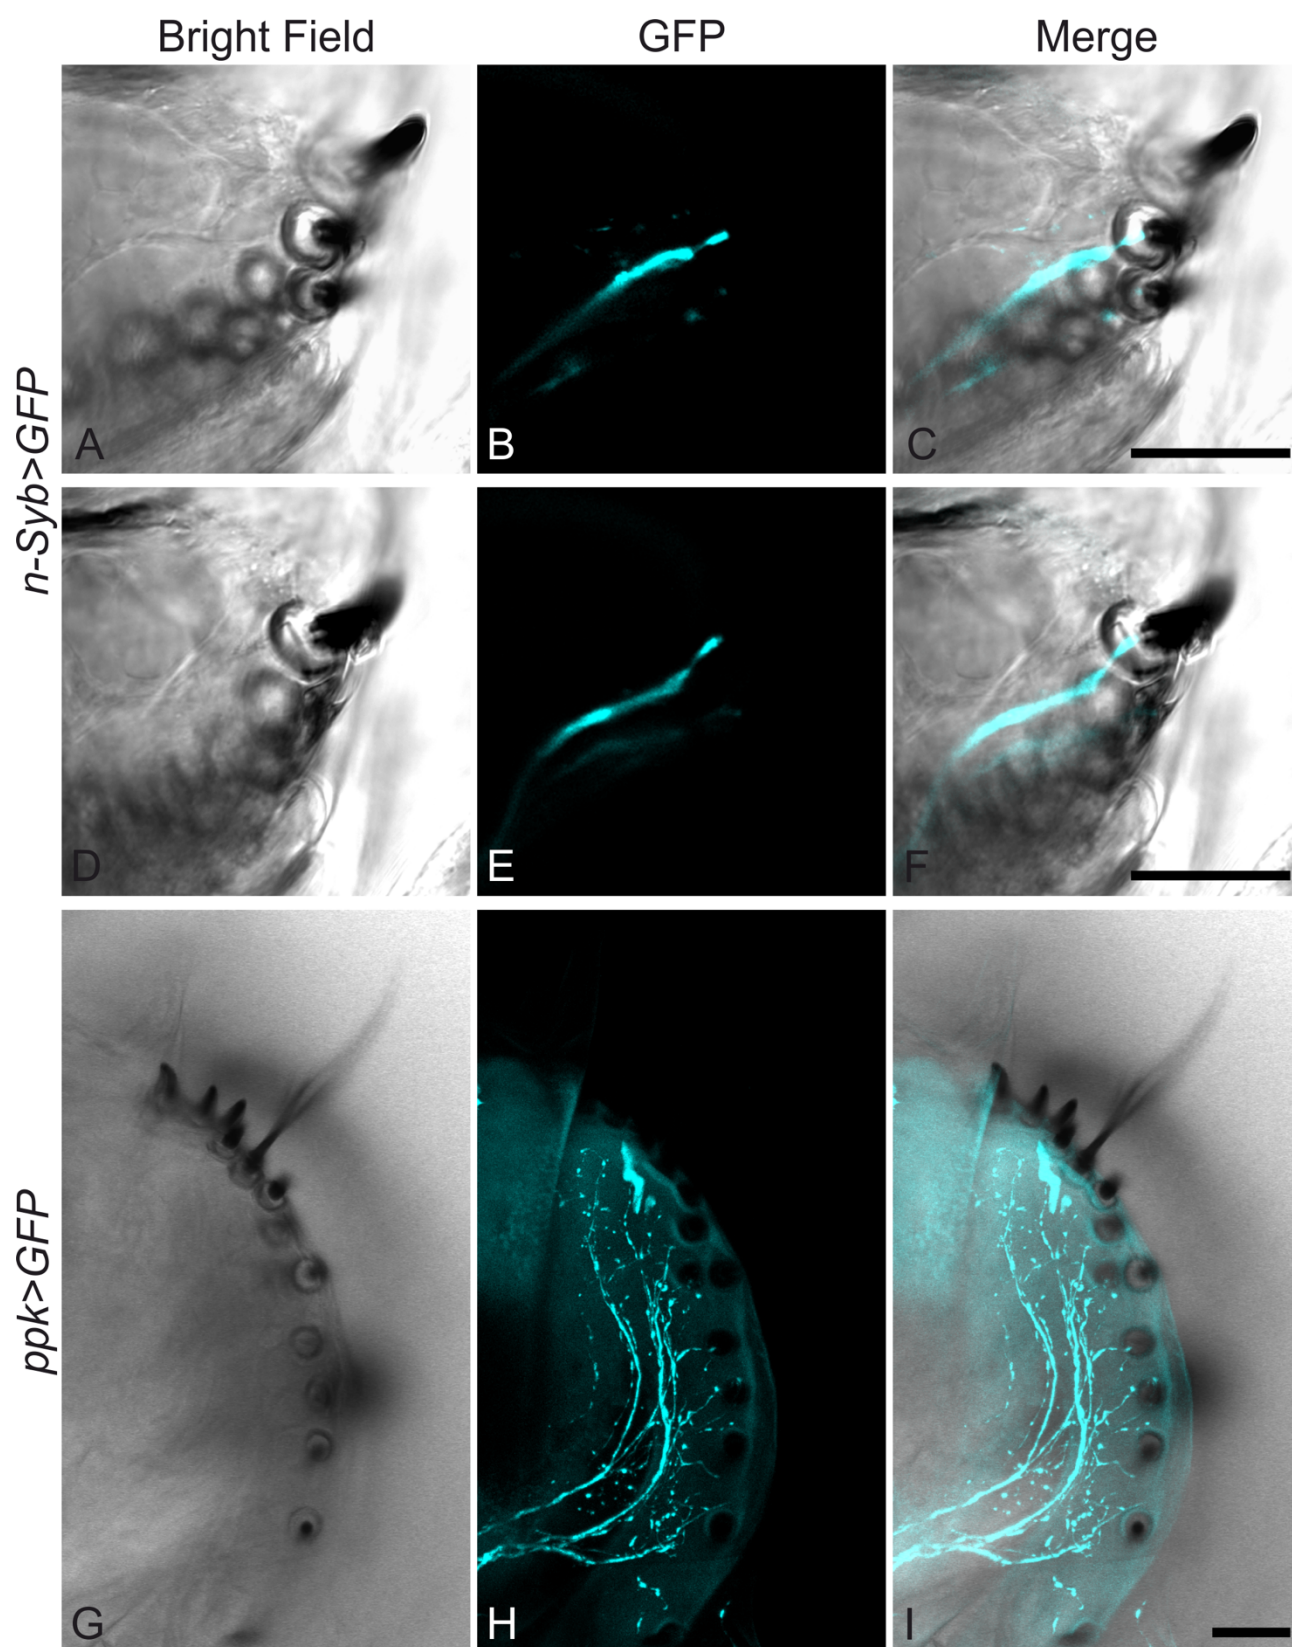

**Figure 6. Gene expression at the *Drosophila melanogaster* ovipositor pegs**

**(A-F)** The pan-neuronal marker *n-syb* showed a single neuron innervating all ovipositor pegs. **(G-I)** *ppk-GAL4* driver that labels ovipositor pegs. All scale bars 20  $\mu$ m.

## 408 DISCUSSION

409 Our results represent the first step toward a full molecular, anatomical, and physiological  
410 characterization of sensory perception in the *D. suzukii* ovipositor and its closely related species. In  
411 particular, these findings have (i) provided a qualitative overview of sensory genes expressed in  
412 the abdominal distal tip of four *Drosophila* species with different ovipositor shapes and egg-laying  
413 behaviours, have (ii) shown that pegs and sensilla present in the *D. suzukii* ovipositor tip have a  
414 mechanosensilla-like structure, and have (iii) identified the sodium channel *ppk* as the sensory  
415 receptor expressed in the *D. melanogaster* ovipositor pegs.

416 It has long been suggested that chemoreceptors are present in *D. melanogaster* female  
417 genitalia (12,13,30) but to our knowledge, this hypothesis has never been fully proven. Our  
418 transcriptome results have revealed that transcription of few chemoreceptors in the abdominal  
419 distal tip is a common feature in *Drosophila* species. However, both the ultrastructure of *D. suzukii*  
420 ovipositor's pegs and sensilla, as well as the GAL4-driven GFP expression in *D. melanogaster*  
421 ovipositor's pegs pointed out that these sensory structures host mechanoreceptors but not  
422 chemoreceptors. This suggests that the distal tip of *Drosophila* ovipositors is not used to evaluate  
423 the chemical composition of the egg-laying substrate.

424 On the other hand, the presence of a common transcriptional core of several homologous  
425 genes encoding for chemoreceptors suggests a conserved functional role of these proteins in the  
426 abdominal distal tip of *Drosophila* species. Of these, *Gr66a* is among the best characterized *D.*  
427 *melanogaster* GRs. It is normally expressed in broadly-tuned bitter-sensing neurons and its  
428 canonical function is the detection of aversive compounds (31–34). Its expression is not restricted  
429 to taste neurons (30), but it has been also identified in multidendritic neurons in the adult  
430 *Drosophila* abdomen (35), which may be the origin of the transcripts detected in our study. Other  
431 taste receptors for which we observed a transcriptional overlap among species are *Ir47a* and

432 *Ir62a*, whose expression in *D. melanogaster* have been identified by GAL4-driven GFP expression  
 433 in taste neurons in leg and labellum (36). Recently, *Ir62a* has been shown to be required together  
 434 with *Ir25a* and *Ir76b* in specific GRNs to taste  $\text{Ca}^{2+}$  in food (37). Consistent with this function, in the  
 435 *D. melanogaster* transcriptome we found the expression of those three transcripts. It has been  
 436 shown that, besides their main function in taste, some GRs (and likely some IRs) may have other  
 437 non-gustatory functions, such as the detection of internal ligands. For example, *Gr43a* is involved  
 438 in fructose detection in the *D. melanogaster* brain, and it is also expressed in the female uterus,  
 439 possibly to sense fructose presence in the seminal fluid (38). We did not detect expression of  
 440 *Gr43a* in any of the four transcriptomes generated in this study, but the expression of the other  
 441 taste receptors found may have similar physiological roles in internal sensing. Internal sensory  
 442 neurons are present in the reproductive tract of *D. melanogaster* to sense sex peptide (39,40), and  
 443 this may be another location where chemoreceptor transcripts are expressed. Interestingly, in all  
 444 *Drosophila* species we could detect the expression of *Or43b* homologs (which in *D. melanogaster*  
 445 is normally expressed in the ab8A antennal sensilla) but not of *Orco*, whose co-expression is  
 446 normally required for odour responsiveness in olfactory organs (41). As discussed before for taste  
 447 receptors, *Or43b* expression localized outside its characteristic pattern may be associated with the  
 448 detection of internal ligands, such as monitoring the internal nutritional state in the final  
 449 gastrointestinal tract or seminal fluid evaluation.

450 *Drosophila suzukii* females use mechanosensation to choose the oviposition site (9,42,43).  
 451 However, the localization of mechanosensory neurons responsible for this behaviour had not been  
 452 shown yet. Here, we propose that the sensilla and pegs present on the ovipositor tip of *D. suzukii*  
 453 are the sensory structures responsible to probe substrate stiffness for the egg-laying site selection.  
 454 It is also possible that these sensory structures work together with other sensory organs, providing  
 455 the information when the ovipositor has penetrated the substrate and peristaltic waves can start



456 to push down the egg. Our transcriptome analysis found the expression of several genes encoding  
457 for receptors known to be expressed in proprioceptive neurons and nociceptors (44–49). The  
458 expression of most of these transcripts seems to be conserved among the four *Drosophila* species  
459 suggesting a conserved functional role. These genes represent the best candidates to be expressed  
460 in the ovipositor pegs and sensilla of *D. suzukii*.

461       Mechanosensation is important also for *D. biarmipes* and *D. melanogaster* egg-laying site  
462 choice (9), and we hypothesized that pegs and sensilla present in the tip of all *Drosophila*  
463 ovipositors may host mechanosensory-like neurons similar to those observed in *D. suzukii*. Hence,  
464 we used GAL4-driven GFP expression to identify genes expressed in *D. melanogaster* ovipositor  
465 pegs. Expression of *nsyb* showed that these appendages are innervated by a neuron that stopped  
466 at the base of the peg, likewise in *D. suzukii*, thus supporting the presence of mechanosensory  
467 neurons. We also showed that these neurons express *ppk*, a mechanosensitive channel in  
468 proprioceptive neurons (45).

469       Taken together, these findings represent an important step in delineating the function of  
470 ovipositor pegs and sensilla in *Drosophila* species with different egg-laying behaviour. Our work  
471 builds a necessary starting point for functional studies, to assess the relationship between the  
472 structure and the function of the ovipositor sensilla, and to better understand how the egg-laying  
473 behaviour diverged across *Drosophila* species. Experiments aimed to further elucidate the  
474 mechanosensory system in the ovipositor of *D. suzukii* might allow for a development of  
475 mechanosensory-based control strategies.

## 476 BIBLIOGRAPHY

- 477 1. Hauser M. 2011 A historic account of the invasion of *Drosophila suzukii* (Matsumura)  
478 (Diptera: Drosophilidae) in the continental United States, with remarks on their  
479 identification. Pest Manag Sci. 67:1352–7.
- 480 2. Cini A, Ioriatti C, Anfora G. 2012 A review of the invasion of *Drosophila suzukii* in Europe and  
481 a draft research agenda for integrated pest management. Bull Insectology. 65:149–60.

- 482 3. Asplen MK, Anfora G, Biondi A, Choi DS, Chu D, Daane KM, Gilbert P, Gutierrez AP, Hoelmer  
483 KA, Hutchinson WD, et al. 2015 Invasion biology of spotted wing *Drosophila* (*Drosophila*  
484 *suzukii*): a global perspective and future priorities. J Pest Sci 88:469–94.
- 485 4. Cloonan KR, Abraham J, Angeli S, Syed Z, Rodriguez-Saona C. Advances in the chemical  
486 ecology of the spotted wing *Drosophila* (*Drosophila suzukii*) and its applications. J Chem Ecol  
487 44:922-939.
- 488 5. Ramasamy S, Ometto L, Crava CM, Revadi S, Kaur R, Horner D, Pisai D, Dekker T, Anfora G,  
489 rota-Stabelli O. 2016 The evolution of olfactory gene families in *Drosophila* and the genomic  
490 basis of chemical-ecological adaptation in *Drosophila suzukii*. Genome Biol Evol. 8:2297-  
491 2311.
- 492 6. Crava CM, Ramasamy S, Ometto L, Anfora G, Rota-Stabelli O. 2016 Evolutionary insights into  
493 taste perception of the invasive pest *Drosophila suzukii*. G3 Genes, Genomes, Genet.  
494 6:4185-4196
- 495 7. Atallah J, Teixeira L, Salazar R, Zaragoza G, Kopp A. 2014 The making of a pest: the evolution  
496 of a fruit-penetrating ovipositor in *Drosophila suzukii* and related species. Proc R Soc B Biol  
497 Sci. 281: 20132840.
- 498 8. Muto L, Kamimura Y, Tanaka KM, Takahashi A. 2018 An innovative ovipositor for niche  
499 exploitation impacts genital coevolution between sexes in a fruit-damaging *Drosophila*. Proc  
500 R Soc B Biol Sci. 285: 20181635.
- 501 9. Karageorgi M, Bräcker LB, Lebreton S, Minervino C, Cavey M, Siju KP, Grunwald Kanow IC,  
502 Gompel N, Proud'homme B. 2017 Evolution of multiple sensory systems drives novel egg-  
503 laying behavior in the fruit pest *Drosophila suzukii*. Curr Biol. 27:847–53.
- 504 10. Hickner P V., Rivaldi CL, Johnson CM, Siddappaji M, Raster GJ, Syed Z. 2016 The making of a  
505 pest: Insights from the evolution of chemosensory receptor families in a pestiferous and  
506 invasive fly, *Drosophila suzukii*. BMC Genomics 17:1–17.
- 507 11. Joseph RM, Carlson JR. 2015 *Drosophila* chemoreceptors: A molecular interface between  
508 the chemical world and the brain. Trends Genet 31:683–695.
- 509 12. Stocker RF. 1994 The organization of the chemosensory system in *Drosophila melanogaster*:  
510 a review. Cell Tissue Res. 275:3–26.
- 511 13. Taylor BJ. 1989 Sexually dimorphic neurons of the terminalia of *Drosophila melanogaster*: II.  
512 Sex-specific axonal arborizations in the central nervous system. J Neurogenet. 5:193–213.
- 513 14. Rebora M, Piersanti S, Dell'Otto A, Gaino E. 2013 The gustatory sensilla on the endophytic  
514 ovipositor of Odonata. Arthropod Struct Dev 42:127–34.
- 515 15. van Lenteren JC, Ruschioni S, Romani R, van Loon JJA, Qiu YT, Smid HM, Isidoro N, Bin F.  
516 2007 Structure and electrophysiological responses of gustatory organs on the ovipositor of  
517 the parasitoid *Leptopilina heterotoma*. Arthropod Struct Dev. 36:271–276.
- 518 16. Seada MA, Hamza AM. 2018 Differential morphology of the sensory sensilla of antennae,  
519 palpi, foretarsi and ovipositor of adult *Tribolium castaneum* (Herbst)  
520 (Coleoptera:Tenebrionidae). Ann Agric Sci. 63:1–8.
- 521 17. Seada MA, Ignell R, Anderson P. 2016 Morphology and distribution of ovipositor sensilla of  
522 female cotton leaf worm *Spodoptera littoralis* (Lepidoptera: Noctuidae), and evidence for  
523 gustatory function. Entomol Sci. 19:9–19.
- 524 18. Martin LBB, Rose JKC. 2014 There's more than one way to skin a fruit: Formation and  
525 functions of fruit cuticles. J Exp Bot. 65:4639–4651.
- 526 19. Bolger AM, Lohse M, Usadel B. 2014 Trimmomatic: A flexible trimmer for Illumina sequence  
527 data. Bioinformatics. 30:2114-2120.
- 528 20. Grabherr MG, Haas BJ, Yassour M, Levin JZ, Thompson DA, Amit I, Adiconis X, Fan L,  
529 Raychowdhury R, Zeng Q et al. 2011 Full-length transcriptome assembly from RNA-Seq data



without a reference genome. *Nat Biotechnol.* 29:644–652.

21. Langmead B, Trapnell C, Pop M, Salzberg S. 2009 Ultrafast and memory-efficient alignment of short DNA sequences to the human genome. *Genome Biol.* 10:R25.
22. Altschul SF, Gish W, Miller W, Myers EW, Lipman DJ. 1990 Basic Local Alignment Search Tool. *J Mol Biol.* 215:403–10.
23. Mi H, Huang X, Muruganujan A, Tang H, Mills C, Kang D, Thomas PD. 2017 PANTHER version 11: Expanded annotation data from Gene Ontology and Reactome pathways, and data analysis tool enhancements. *Nucleic Acids Res.* 45:D183–9.
24. Oliveros JC. 2015 Venny. An interactive tool for comparing lists with Venn’s diagrams. Available from: <http://bioinfogp.cnb.csic.es/tools/venny/index.html>
25. Li B, Dewey CN. 2011 RSEM: accurate transcript quantification from RNA-Seq data with or without a reference genome. *BMC Bioinformatics.* 12:323.
26. Bellemer A. 2015 Thermotaxis, circadian rhythms, and TRP channels in *Drosophila*. *Temperature.* 2:227–243.
27. Paschinger K, Rendić D, Wilson IBH. 2009 Revealing the anti-HRP epitope in *Drosophila* and *Caenorhabditis*. *Glycoconj J.* 26:385–395.
28. Jenett A, Rubin GM, Ngo TTB, Shepherd D, Murphy C, Dionne H, Pfeiffer BD, Cavallaro A, Hall D, Jeter J, et al. 2012 A GAL4-driver line resource for *Drosophila* neurobiology. *Cell Rep.* 2:991–1001.
29. Tuthill JC, Wilson RI. 2016 Parallel transformation of tactile signals in central circuits of *Drosophila*. *Cell.* 164:1046–1059.
30. Dunipace L, Meister S, Mcnealy C, Amrein H. 2001 Spatially restricted expression of candidate taste receptors in the *Drosophila* gustatory system. *Curr Biol.* 11:822–35.
31. Weiss LA, Dahanukar A, Kwon JY, Banerjee D, Carlson JR. 2011 The molecular and cellular basis of bitter taste in *Drosophila*. *Neuron.* 69:258–72.
32. Shim J, Lee Y, Jeong YT, Kim Y, Lee MG, Montell C, Moon SJ. 2015 The full repertoire of *Drosophila* gustatory receptors for detecting an aversive compound. *Nat Commun* 6:8867.
33. Hussain A, Zhang M, Üçpınar HK, Svensson T, Quillery E. 2016 Ionotropic chemosensory receptors mediate the taste and smell of polyamines. 14: e1002454.
34. Soldano A, Alpizar YA, Boonen B, Franco L, Liu G, Mora N, Yaksi E, Voets T, Vennekens R, Hassan BA, et al. 2016 Gustatory-mediated avoidance of bacterial lipopolysaccharides via TRPA1 activation in *Drosophila*. *eLife.* 5:e13133.
35. Shimono K, Fujimoto A, Tsuyama T, Yamamoto M, Sato M, Hattori Y, Sugimura K, Usui T, Kimura K, Uemura T. 2009 Multidendritic sensory neurons in the adult *Drosophila* abdomen: origins, dendritic morphology, and segment- and age-dependent. *Neural Develop.* 4:37.
36. Koh TW, He Z, Gorur-Shandilya S, Menuz K, Larter NK, Stewart S, Carlson JR. 2014 The *Drosophila* IR20a clade of ionotropic receptors are candidate taste and pheromone receptors. *Neuron.* 83:850–65.
37. Lee Y, Poudel S, Kim Y, Thakur D, Montell C. 2018 Calcium taste avoidance in *Drosophila*. *Neuron* 97:67–74.e4.
38. Miyamoto T, Amrein H. 2014 Diverse roles for the *Drosophila* fructose sensor Gr43a. *Fly (Austin).* 8:19–25.
39. Yang C, Rumpf S, Xiang Y, Gordon MD, Song W, Jan LY, Jan NH. 2009 Control of the postmating behavioral switch in *Drosophila* females by internal sensory neurons. *Neuron.* 61:519–26.
40. Hasemeyer M, Yapici N, Heberlein U, Dickson BJ. 2009 Sensory neurons in the *Drosophila* genital tract regulate female reproductive behavior. *Neuron.* 61:511–8.
41. Elmore T, Ignell R, Carlson JR, Smith DP. 2003 Targeted mutation of a *Drosophila* odor

receptor defines receptor requirement in a novel class of sensillum. J Neurosci. 23:9906–12.

42. Ioriatti C, Walton V., Dalton D., Anfora G., Grassi A., Maistri S., Mazzoni V. 2015. *Drosophila suzukii* (Diptera: Drosophilidae) and its potential impact to wine grapes during harvest in two cool climate wine grape production regions. Journal of Economic Entomology. 108: 1148-1155.

43. Burrack HJ, Fernandez GE, Spivey T, Kraus DA. 2013. Variation in selection and utilization of host crops in the field and laboratory by *Drosophila suzukii* Matsumura (Diptera: Drosophilidae), an invasive frugivore. Pest Manag. Sci. 69, 1173–1180.

42. Cheng LE, Song W, Looger LL, Jan LY, Jan YN. 2010 The Role of the TRP channel NompC in *Drosophila* larval and adult locomotion. Neuron. 67:373–380.

43. Gorczyca DA, Younger S, Meltzer S, Kim SE, Cheng L, Song W, Lee HY, Jan LY, Jan YN. 2014 Identification of Ppk26, a DEG/ENaC channel functioning with Ppk1 in a mutually dependent manner to guide locomotion behavior in *Drosophila* Cell Rep. 9:1446–58.

45. Zhong L, Hwang RY, Tracey WD. 2010 Pickpocket Is a DEG/ENaC protein required for mechanical nociception in *Drosophila* larvae. Curr Biol. 20:429–434.

46. Guo Y, Wang Y, Wang Q. 2014 The role of PPK26 in *Drosophila* larval mechanical nociception. Cell Rep. 9:1183–1190.

47. Walker RG, Willingham AT, Zuker CS.. 2000 *Drosophila* mechanosensory transduction channel. Science. 287:2229-2234.

48. Tracey WD, Wilson RI, Laurent G, Benzer S. 2003 *painless* , a *Drosophila* gene essential for nociception. Cell. 113:261–73.
